# Supplementary material
Source: ML conference proceedings conference paper supplement (https://openreview.net/forum?id=j02kh2R1W5)
Supplement: supplementary_material [file Usage Instructions for Code.pdf › Usage Instructions for Code.pdf]

# InfoCLIP++ Implementation: Usage Guide

## 1. Environment Setup

### 1.1 Prerequisites

Python 3.8–3.10 (compatible with PyTorch 1.13.1 and dependencies)

CUDA 11.3–11.7 (required for GPU acceleration; CPU-only training is unsupported for full pre-training)

Minimum 16GB GPU memory (for batch size 32; reduce batch size in config.json for smaller GPUs)

Internet connection (to download pre-trained backbones: DINOv2, BERT)

### 1.2 Installation

Clone the repository (if applicable)

```
git clone <repository-url>
```

```
cd infoclip-plus-plus
```

Install required dependencies

```
pip install -r requirements.txt
```

## 2. Dataset Preparation

### 2.1 Required Datasets

ImageNet-1K: For zero-shot classification task

COCO 2017: For cross-modal retrieval task

ADE20K: For fine-grained alignment task

### 2.2 Dataset Structure

Organize your datasets as follows:

```
datasets/
├── imagenet/
│   ├── train/
│   │   ├── n01440764/
│   │   └── ... (other classes)
│   └── val/
│       ├── n01440764/
│       └── ... (other classes)
├── coco/
└── images/
```

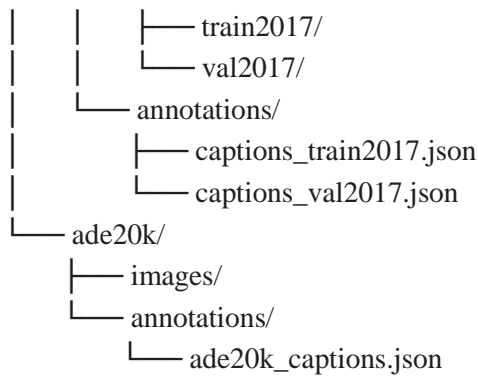

## 2.3 Configuration File Update

Modify `config.json` to point to your dataset locations:

```
"imagenet_root": "/path/to/your/datasets/imagenet",
"coco_root": "/path/to/your/datasets/coco/images",
"coco_train_ann": "/path/to/your/datasets/coco/annotations/captions_train2017.json",
"coco_val_ann": "/path/to/your/datasets/coco/annotations/captions_val2017.json",
"ade20k_root": "/path/to/your/datasets/ade20k/images",
"ade20k_ann": "/path/to/your/datasets/ade20k/annotations/ade20k_captions.json"
```

## 3. Training the Model

### 3.1 Basic Training Command

```
python trainer.py --config config.json
```

### 3.2 Training with Custom Parameters

You can override configuration parameters via command line:

```
python trainer.py --config config.json \
    --batch_size 16 \
    --num_epochs 50 \
    --lr 5e-4 \
    --save_dir ./custom_results
```

### 3.3 Training Monitoring

Checkpoints are saved in the `save\_dir` directory

Training logs are written to `training.log` in the save directory

Loss curves and metrics are saved as PNG files

## 4. Evaluating the Model

## 4.1 Evaluating a Trained Model

To evaluate a trained model on all three tasks:

```
python trainer.py --config config.json \  
    --eval-only \  
    --resume ./results/checkpoint_best.pth
```

## 4.2 Task-Specific Evaluation

To evaluate on specific tasks only:

Evaluate only on ImageNet zero-shot classification

```
python trainer.py --config config.json \  
    --eval-only \  
    --resume ./results/checkpoint_best.pth \  
    --tasks imagenet
```

Evaluate on COCO and ADE20K

```
python trainer.py --config config.json \  
    --eval-only \  
    --resume ./results/checkpoint_best.pth \  
    --tasks coco ade20k
```

# 5. Understanding the Output

## 5.1 Training Output

Periodic loss values for each component of the unified loss

Learning rate updates

Validation metrics after each epoch

Checkpoint saves when validation performance improves

## 5.2 Evaluation Output

ImageNet-1K: Top-1 and Top-5 accuracy for zero-shot classification

COCO: Recall@1, Recall@5, Recall@10 for image-to-text and text-to-image retrieval

ADE20K: Fine-grained alignment metrics including HGR correlation scores and alignment error

## 5.3 Saved Results

Trained model checkpoints

Evaluation metrics in JSON format

Visualization of alignment results (for ADE20K)

Training curves for loss and key metrics

# 6. Advanced Options

## 6.1 Hardware Configuration

Force CPU training (not recommended for full training):

```
python trainer.py --config config.json --device cpu
```

Specify specific GPU:

```
python trainer.py --config config.json --device cuda:1
```

## 6.2 Hyperparameter Tuning

Adjust key hyperparameters in `config.json` or via command line:

Window size for pixel-level OT (`window\_size`)

Rank parameter for low-rank approximation (`r`)

Temperature parameters for attention mechanisms (`tau`)

Loss weights (`lambda2`, `lambda3`, `lambda4`, `lambda5`)

## 6.3 Ablation Studies

To disable specific components for ablation studies:

Disable pixel-level OT

```
python trainer.py --config config.json --no-pixel-ot
```

Disable adaptive routing

```
python trainer.py --config config.json --no-adaptive-routing
```
